# Supplementary material for: Entropy connects water structure and dynamics in protein hydration layer
Source: Royal Society of Chemistry journal article supplement (doi:10.1039/c8cp01674g), 2018-01-01
Supplement: c8cp01674g1.pdf [file c8cp01674g1.pdf]

## Supplementary data

### Entropy connects water structure and dynamics in protein hydration layer

Jayangika N. Dahanayake and Katie R. Mitchell-Koch\*

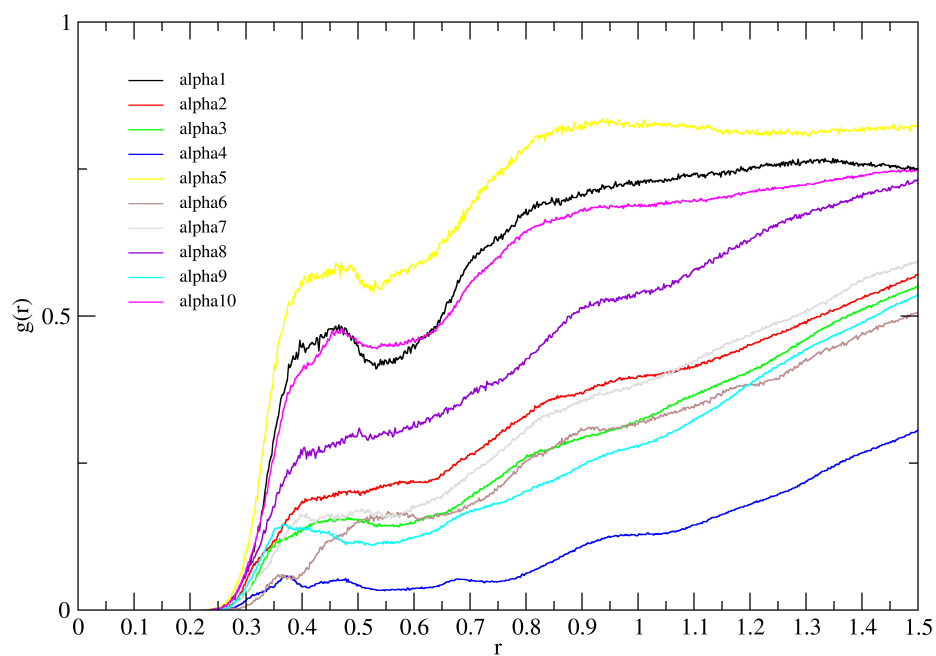

**Figure S1.** Solvent radial distribution functions were also calculated for water molecules around the C $\alpha$  atoms of the protein backbone.

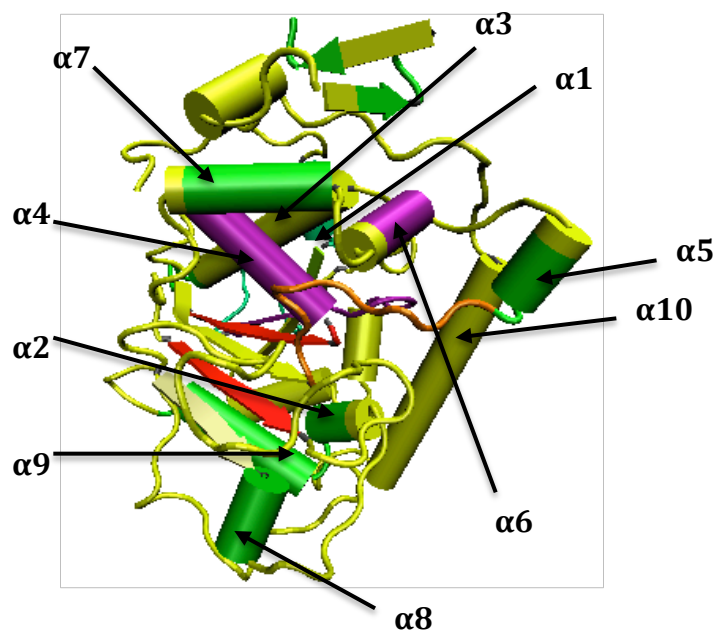

**Figure S2.** CALB structure color coded according to water-protein hydrogen bond life times in GROMOS 53a6 forcefield. Green <30 ps, yellow 30-75 ps, orange 75-100 ps, pink 100-1000 ps, and red >1000 ps.

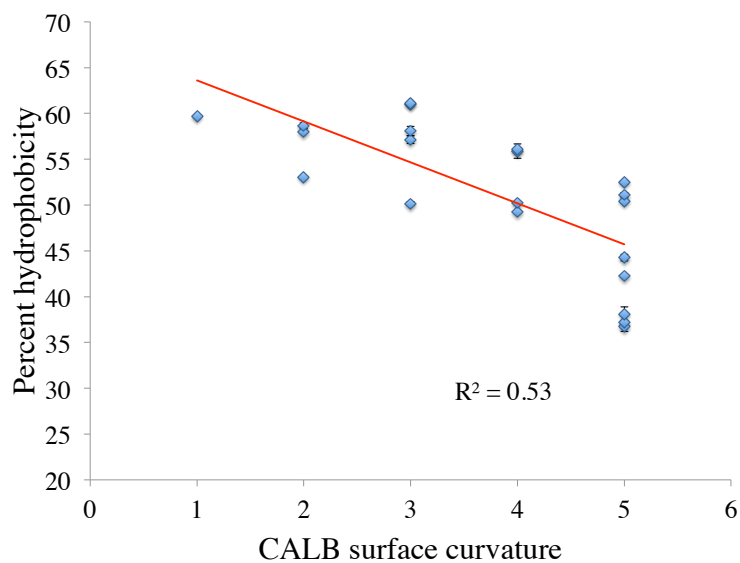

**Figure S3.** Correlation between CALB surface percent hydrophobicity and CALB surface curvature.

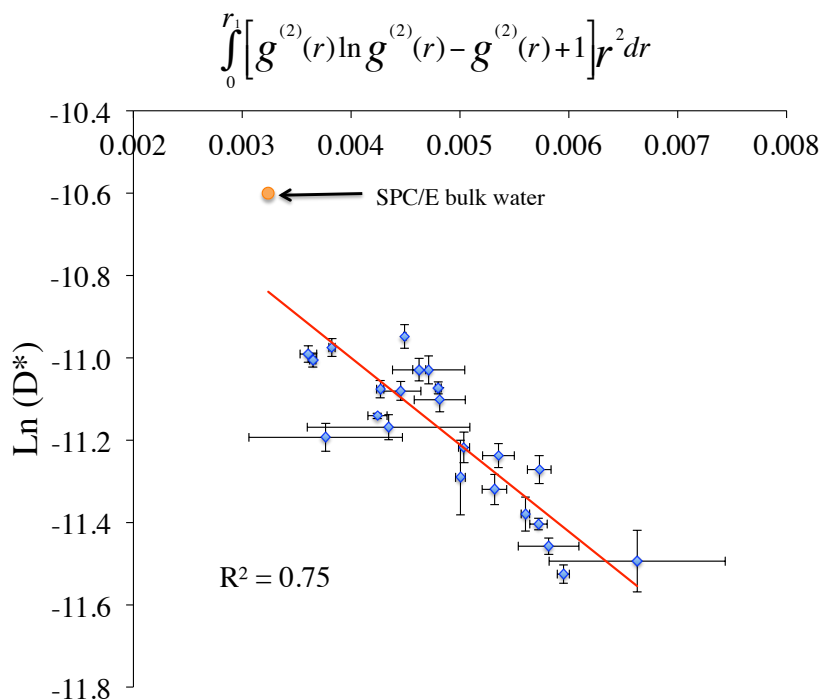

**Figure S4.** Logarithmic relationship between hydration shell water diffusivity and integral part of the pair entropy calculation, as described in Eq. 9 with SPC/E water model. A data point for the SPC/E bulk water is also shown here. The correlation coefficient contains the data point for the SPC/E bulk water.

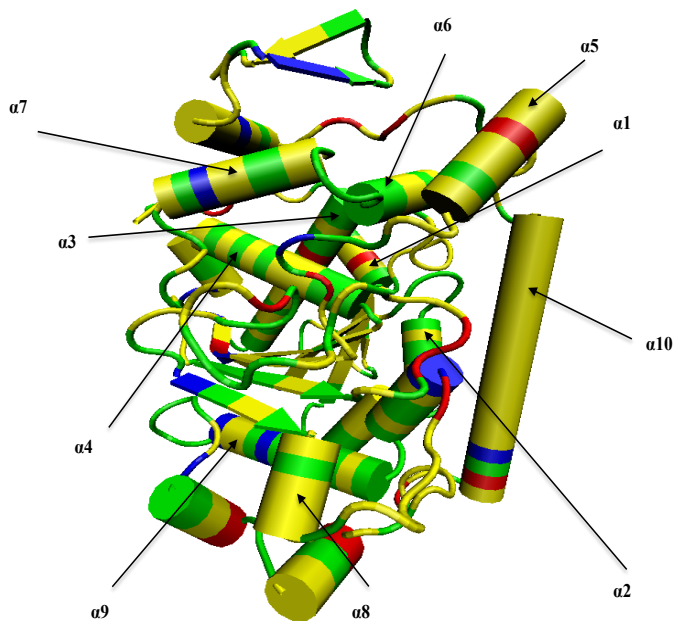

**Figure S5.** CALB surface color-coded by amino acid type. Yellow indicates hydrophobic residues, green indicates polar residues, red indicates acidic residues, and blue corresponds to basic residues.

**Table S1.** Interfacial hydration dynamics around helix  $\alpha 5$  in different conformations.

| <b>Conformation</b> | <b>Hydrogen bond lifetime (ps)</b> | <b>Residence time (ps)</b> | <b>Reorientation time (ps)</b> |
|---------------------|------------------------------------|----------------------------|--------------------------------|
| Crystal-like        | $24.4 \pm 3.4$                     | $39.8 \pm 1.2$             | $2.42 \pm 0.04$                |
| Close               | $26.6 \pm 1.0$                     | $43.1 \pm 0.6$             | $2.40 \pm 0.02$                |
| Open                | $20.8 \pm 1.1$                     | $40.7 \pm 1.0$             | $2.39 \pm 0.04$                |

**Table S2.** Reorientation times ( $\tau_2$ ) calculated for the water O-H vectors.

|                               | <b>Reorientation time (ps)</b> |
|-------------------------------|--------------------------------|
| <b><math>\alpha 1</math></b>  | $2.3 \pm 0.1$                  |
| <b><math>\alpha 2</math></b>  | $3.4 \pm 0.2$                  |
| <b><math>\alpha 3</math></b>  | $3.7 \pm 0.2$                  |
| <b><math>\alpha 4</math></b>  | $6.0 \pm 0.5$                  |
| <b><math>\alpha 5</math></b>  | $2.7 \pm 0.3$                  |
| <b><math>\alpha 6</math></b>  | $5.8 \pm 1.0$                  |
| <b><math>\alpha 7</math></b>  | $2.6 \pm 0.1$                  |
| <b><math>\alpha 8</math></b>  | $2.6 \pm 0.1$                  |
| <b><math>\alpha 9</math></b>  | $3.5 \pm 0.5$                  |
| <b><math>\alpha 10</math></b> | $2.9 \pm 0.1$                  |

**Table S3.** Water-protein hydrogen bond lifetimes (HBLTs) obtained by fitting autocorrelation functions with both biexponential and triexponential fits ( $\sum A_i e^{-t/\tau_i}$ ), where values of  $HBLT = \sum A_i \tau_i$ .

|                               | <b>HBLT (ps) with biexponential fit</b> | <b>HBLT (ps) with triexponential fit</b> |
|-------------------------------|-----------------------------------------|------------------------------------------|
| <b><math>\alpha 1</math></b>  | 44.5 $\pm$ 9.8                          | 38.2 $\pm$ 10.1                          |
| <b><math>\alpha 2</math></b>  | 196 $\pm$ 32                            | 198 $\pm$ 35                             |
| <b><math>\alpha 3</math></b>  | 230 $\pm$ 20                            | 243 $\pm$ 17                             |
| <b><math>\alpha 4</math></b>  | 315 $\pm$ 88                            | 315 $\pm$ 88                             |
| <b><math>\alpha 5</math></b>  | 49.8 $\pm$ 7.5                          | 47.9 $\pm$ 16.2                          |
| <b><math>\alpha 6</math></b>  | 763 $\pm$ 144                           | 825 $\pm$ 46                             |
| <b><math>\alpha 7</math></b>  | 60.7 $\pm$ 17.6                         | 62.2 $\pm$ 11.4                          |
| <b><math>\alpha 8</math></b>  | 36.6 $\pm$ 1.6                          | 36.6 $\pm$ 2.4                           |
| <b><math>\alpha 9</math></b>  | 154 $\pm$ 32                            | 160 $\pm$ 51                             |
| <b><math>\alpha 10</math></b> | 158 $\pm$ 21                            | 187 $\pm$ 15                             |

**Table S4.** Some properties of solvent exposed secondary structures.

| Solvent exposed secondary structures | HBLT (order of increasing) | Number of h-bonding side chains | Number of doubly h-bonding side chains | % 1-4 h-bond donor neighbours | % surface area with h-bonding side chains | % surface area with doubly h-bonding side chains | Number of hydrophobic residues | Number of acidic residues | Number of basic residues |
|--------------------------------------|----------------------------|---------------------------------|----------------------------------------|-------------------------------|-------------------------------------------|--------------------------------------------------|--------------------------------|---------------------------|--------------------------|
| <b><math>\alpha</math>1</b>          | 22.76 $\pm$ 0.40           | 3                               | 2                                      | 33%                           | 65%                                       | 35%                                              | 3                              | 1                         | 1                        |
| <b><math>\beta</math>7</b>           | 23.07 $\pm$ 3.20           | 3                               | 2                                      | 33%                           | 94%                                       | 42%                                              | 1                              | 0                         | 1                        |
| <b><math>\alpha</math>5</b>          | 23.80 $\pm$ 1.70           | 1                               | 1                                      | 0%                            | 4%                                        | 4%                                               | 4                              | 1                         | 0                        |
| <b><math>\alpha</math>8</b>          | 25.08 $\pm$ 0.81           | 1                               | 1                                      | 0%                            | 13%                                       | 13%                                              | 3                              | 0                         | 0                        |
| <b><math>\beta</math>1</b>           | 25.46 $\pm$ 1.29           | 1                               | 1                                      | -                             | 73%                                       | 73%                                              | 1                              | 0                         | 0                        |
| <b><math>\beta</math>8</b>           | 28.01 $\pm$ 1.48           | 2                               | 2                                      | -                             | 100%                                      | 100%                                             | 0                              | 0                         | 1                        |
| <b><math>\beta</math>9</b>           | 30.01 $\pm$ 4.12           | 0                               | 0                                      | -                             | -                                         | -                                                | 2                              | 0                         | 0                        |
| <b><math>\alpha</math>10</b>         | 40.06 $\pm$ 2.10           | 3                               | 2                                      | 0%                            | 21%                                       | 15%                                              | 17                             | 1                         | 1                        |
